# Supplementary material
Source: MDPI journal article supplement (https://www.mdpi.com/2072-4292/15/24/5642)
Supplement: s1 [file s1]

## Supplementary Materials:

**Table S1: PhenoCam networks world-wide**

**Vegetation Type:** DF- Deciduous forest, MF: Mixed forests, CR: Croplands, SA: Savannas, TN: Tundra, EF: Evergreen forests, GR: grasslands, SH: shrublands, MG: Mangrove, WL: Wetlands

**Parameters monitored :** SM: snowmelt, SOG: start of the growing season, MOG: max of the growing season, EOG: end of the growing season, FSF: first autumn snow fall SOS: Start of Spring, EOS: End of Spring, SOF: Start of Fall, End of Fall , MOF: middle of fall, MOS: middle of spring, LOS: Length of Season, POF: peak of flowering, GU: green-up, Mat: maturity, Sen: senescence, Dorm: Dormancy, SLE: the start of leaf-expansion, ELF: end of leaf-fall, Flw: Flowering, POR: peak of redness, EOR: end of redness, POS Peak of season, SEN: start of leaf senescence

| Sl. No | Location      | Lat-long          | Year      | Vegetation Type    | PhenoCam Index      | Parameters monitored   | Satellite Data / Other | Result                                                                                                                                               | Reference |
|--------|---------------|-------------------|-----------|--------------------|---------------------|------------------------|------------------------|------------------------------------------------------------------------------------------------------------------------------------------------------|-----------|
| 1      | Svalbard      | 78° 9'N, 16° 1'E  | 2015      | GR                 | 2G_RBi, GCC, GRVI   | SM, SOG, MOG, EOG, FSF | -                      | GRVI and NDVI measured obtained through both active and passive sensors exhibited similar vegetation attributes.                                     | [50]      |
| 2      | USA           | 31°44'N,109°55'W  | 2014 - 15 | GR                 | GCC                 | SOG, EOG, & LOG        | MODIS                  | GCC may be more suitable for estimating changes in grassland greenness during the senescence.                                                        | [51]      |
| 3      | USA           | 31°49'N, 110°51'W | 2008      | SH                 | 2G_Rbi              | SOS                    | EC                     | The net ecosystem exchange of CO <sub>2</sub> shows a nearly inverse pattern to the overall greenness of the ecosystem (GCC).                        | [45]      |
| 4      | Japan         | 36° 8'N, 137°25'E | 2005 - 07 | DF                 | 2G_RBi & Hue values | SOG, EOG               | LAI, SPAD (Ground)     | Variations in autumn phenology among tree species can be better monitored using employing the normalized RGB_DN method.                              | [92]      |
| 5      | USA           | -                 | 2013 - 15 | MF, DF, GR, CR, SV | GCC, VCI            | SOS, EOS, SOF & SOF    | MODIS, VIIRS,          | PhenoCam GCC and VCI were exhibited stronger correlation with phenological dates derived from VIIRS EVI2 compared to those obtained from VIIRS NDVI. | [93]      |
| 6      | North America | -                 | 2013 - 15 | EF, DF, SH, GR, CR | NDVI, GCC           | SOG, EOG               | MODIS                  | NDVI values derived from PhenoCam data demonstrate good correlation with NDVI obtained through spectral measurements.                                | [54]      |

|    |          |                   |              |                                |                                                     |                              |                   |                                                                                                                                                                                           |      |
|----|----------|-------------------|--------------|--------------------------------|-----------------------------------------------------|------------------------------|-------------------|-------------------------------------------------------------------------------------------------------------------------------------------------------------------------------------------|------|
| 7  | USA      | -                 | 2014<br>- 15 | EF, DF                         | GCC, RCC                                            | SOG, EOG                     | EC, MODIS-LAI     | RCC was shown better accuracy on both GPP-based SOG and EOG in EF sites                                                                                                                   | [46] |
| 8  | France   | 48.48°N, 2.78°E   | 2012<br>- 18 | DF                             | GCC                                                 | SOG, EOG                     | -                 | A strong correlation between the WPVbb by camera and the data from ground observation                                                                                                     | [44] |
| 9  | Japan    | 36°08'N, 137°25'E | 2007<br>- 09 | DF, EF                         | % of total DN and 2G_ Rbi                           | SOS, EOS, SOF & EOF          | EC                | The DNRGB values in the upward-facing images within DBF were capable of discerning canopy phenology, whereas the same was not observed in ECF.                                            | [94] |
| 10 | Arctic   | 67°30'N, 15°55'E  | 2019<br>- 20 | TN                             | GCC                                                 | SOG, EOG, LOG                | Sentinel 2, MODIS | High level of correlation between Sentinel-2 and PhenoCam indices; the best correlation is with Sentinel-2 EVI                                                                            | [95] |
| 11 | Malaysia | 4°11'N; 114°2'E   | 2013<br>- 14 | EF                             | % of total DN, 2G_ RBi, Hue values, NDVI, EVI, GRVI | Flw                          | -                 | The temporal trends in %RGB and saturation exhibited by individual trees unveiled distinctive traits of tree phenology attributed to flowering, color transformation, and leaf emergence. | [55] |
| 12 | USA      | 39°27'N, 117°36'W | 2015<br>- 17 | SH                             | NDVI, GCC                                           | SOG, EOG, LOG                | Landsat           | Strong concurrence observed between PhenoCam and Landsat NDVI.                                                                                                                            | [96] |
| 13 | Alaska   | 71°17'N, 156°42'W | 2010<br>- 13 | WL                             | 2G_ RBi                                             | SOG, EOG                     | -                 | A strong difference in timing of greenness and its intensity among species                                                                                                                | [97] |
| 14 | USA      | -                 | 2002<br>- 15 | DF, EF, GR, MF, SH, TN, WL, CR | GCC                                                 | SOG, EOG                     | MODIS             | High correlation between PhenoCam and MODIS transition dates for CRO, DBF, DNF and GRA and poor for EBF & ENF.                                                                            | [41] |
| 15 | Brazil   | 22°10'S, 47°52'W  | 2011         | SV                             | GCC                                                 | SOG, EOG                     | -                 | Individual plant species ROIs displayed a higher degree of sensitivity to changes in relative green values compared to the collective community ROIs.                                     | [52] |
| 16 | USA      | 43°58'N, 74°13'W  | 2002<br>- 12 | DF                             | 2G_ Rbi                                             | GU, SOS, Mat, Sen, EOS, Dorm | MODIS, Landsat    | Landsat and MODIS comparison showed strong agreement                                                                                                                                      | [98] |
| 17 | Canada   | 48°22'N, 71°25'W  | 2015<br>- 18 | MF, EF                         | GCC                                                 | SOG, EOG                     | -                 | The initiation and completion of budburst, along with bud setting, were recorded at the points when GCC achieved 72%, 92%, and 94% of its peak magnitude, correspondingly.                | [99] |
| 18 | Italy    | 45°50'N, 7°34'E   | 2013<br>- 15 | GR                             | GCC                                                 | Conopy greenness             | EC                | Due to heat waves, 39% of drop in maximum canopy greenness value and a senescence reported 32 days earlier when compared to mean values.                                                  | [7]  |

|    |             |                   |           |        |                        |                                                                |                             |                                                                                                                                                                                                                                         |       |
|----|-------------|-------------------|-----------|--------|------------------------|----------------------------------------------------------------|-----------------------------|-----------------------------------------------------------------------------------------------------------------------------------------------------------------------------------------------------------------------------------------|-------|
| 19 | Greenland   | 64° 7'N, 51°21'W  | 2010      | WL     | 2G_ Rbi, GCC           | GPP                                                            | EC, WorldView-2             | GPP (EC) were found good correlation with greenness for all plant communities, and the highest correlation - fen.                                                                                                                       | [36]  |
| 20 | Japan       | 36° 8'N, 137°26'E | 2010 - 11 | GR     | GCC, RCC, BCC, 2G_ Rbi | SOS, EOS, SOF & EOF                                            | Portable spectroradiometer  | Seasonal trend of the GCC was shown high correlation to the aboveground green biomass throughout the year                                                                                                                               | [53]  |
| 21 | Australia   | 36°12'S, 148°33'E | 2001 - 16 | GR     | GCC                    | SOS, EOS, SOF, EOF, LOG                                        | MODIS, EC                   | There exists a critical threshold at which excessive summer VPD hinders the ability of Australian mountain grasslands to recover during the latter part of the season.                                                                  | [100] |
| 22 | Japan       | 36° 8'N, 137°25'E | 2004 - 13 | DF     | % of total DN, 2G_ Rbi | SLE, ELF                                                       | -                           | The timing of early ELF was found to be less responsive to changes in air temperature compared to the timing of SLE.                                                                                                                    | [101] |
| 23 |             |                   |           |        |                        |                                                                |                             |                                                                                                                                                                                                                                         |       |
| 24 | Switzerland | 47° 28'N, 8° 21'E | 2005 - 07 | MF, DF | GCC                    | SOS, EOS, Sen                                                  | EC                          | The new leaf appearance dates of the dominant species played a role in shaping the seasonal patterns of spring gross primary productivity (GPP), although their influence was also influenced by the specific local weather conditions. | [102] |
| 25 | USA         | 32°13'N, 110°48'W | 2007      | SH     | 2G_ Rbi                | Flower count                                                   | -                           | The comparison between manually and automatically counted cinchweed blooms resulted in a strong correlation, with an $R^2$ value of 0.97 ( $p < .0001$ ).                                                                               | [103] |
| 26 | USA         | 41°21'N, 70°34'W  | 2013      | DF     | GCC                    | Ecophysiological traits, Sen                                   | -                           | Utilizing camera-based phenology observations proves to be an effective method for accurately quantifying the trends in the START and END of senescence.                                                                                | [81]  |
| 27 | Canada      | 53°43'N, 127°38'W | 2013 - 14 | DF     | 2G_ Rbi, GCC           | Stand-health metrics, vigour, mortality and disease occurrence | Visual forest-health survey | GCC represented differences in healthy <i>vigour</i> and mortality, whereas, EG best representative of occurrences of foliar diseases.                                                                                                  | [85]  |
| 28 | USA         | 44°03' N, 71°17'W | 2013 - 16 | DF     | GCC, RCC               | SOS, EOS, PAI, LAI                                             | PAR                         | The reported transition dates and length in shows large variation among the VIs of $PAI_{CANOPY}$ , GCC, RCC and $PAI_{PARL}$ .                                                                                                         | [86]  |
| 29 | Finland     | 67°21'N, 26°38'E  | 2014 - 15 | EF, WL | GCC                    | SOS, EOS, SOF, EOF                                             | EC                          | The correlation between GCC and CO2 exchange was highest during the spring.                                                                                                                                                             | [104] |

|    |                |                      |              |                         |                                      |                                                       |                                   |                                                                                                                               |       |
|----|----------------|----------------------|--------------|-------------------------|--------------------------------------|-------------------------------------------------------|-----------------------------------|-------------------------------------------------------------------------------------------------------------------------------|-------|
| 30 | Portugal       | 39° 08'N, 8°19'W     | 2011<br>- 18 | EF, SH, GR              | GCC, NDVI,<br>NDWI                   | Greenness<br>variation                                | -                                 | The GRA shows a very good correlation between GCC and NDVI while the GCC of SHB showed a better fit with NDWI than with NDVI. | [105] |
| 31 | USA,<br>Canada | -                    | 2014         | DF, EF, GR              | 2G_ Rbi, GCC                         | GPP                                                   | EC                                | GPP shows better correlation with greenness derived from camera imagery in all 3 PFT                                          | [39]  |
| 32 | Canada         | 52° 2'N, 117° 0'W    | 2010         | SH                      | 2G_ Rbi                              | GU, Sen, Flw, root<br>nutrition                       | -                                 | Protein content of <i>H. alpinum</i> is shows that, a depletion in protein level while plants are growing actively.           | [106] |
| 33 | Brazil         | 7°58'S, 38°23'W      | 2018<br>- 19 | Caatinga<br>woody plant | GCC                                  | EOS, SOS                                              | MODIS, Sentinel 2                 | Seasonal GCC and NDVI derived from optical RS were indeed strongly related to water use.                                      | [107] |
| 34 | Japan          | -                    | 2012         | DF                      | GRVI, RCC,<br>ExR, RGR,<br>VARI, Hue | Leaf color<br>duration, Autumn<br>leaf phenology      | -                                 | For max leaf-color brightness - target autumn leaf color                                                                      | [108] |
| 35 | Brazil         | 2°51'S, 54°58'W      | 2000<br>- 19 | EF                      | leafless tree-<br>crowns<br>fraction | leafless or leafy                                     | MODIS, Planet<br>Scope            | At ecosystem-level, the observed pattern in NPV fraction correlate well to PhenoCam based leafless tree-crown fraction.       | [109] |
| 36 | China          | 44.42°N, 122.87°E    | 2012<br>- 14 | GR                      | 2G_ Rbi                              | GPP                                                   | EC                                | For the 3 continuous years, the daily fAPAR from PhenoCam shows similar temporal pattern with the EC-GPP.                     | [25]  |
| 37 | Brazil         | 2° 8' S, 59° 0'W     | 2015<br>- 16 | EF                      | GCC                                  | GU, Mat, Sen,<br>Dorm                                 | MODIS                             | Observed post-drought changes in the timing in leaf demography                                                                | [88]  |
| 38 | USA            | 37°55'N, 78°16'W     | 2018         | DF                      | GCC, NDVI                            | Canopy Closure,<br>LAI                                | UAV, MODIS and<br>Landsat 8       | Shift from spring phenophases to canopy-closure largely agrees among sensors other than Landsat 8 or MODIS.                   | [110] |
| 39 | USA            | 38°16'N,<br>119°34'W | 2012<br>- 15 | SV, GR                  | NDVI                                 | GU, Mat, Sen,<br>Dorm                                 | MODIS, VIIRS,<br>Landsat 8        | Results show that NDVI - satellite are strongly correlated with PhenoCam NDVI time series.                                    | [111] |
| 40 | Italy          | 45°50'N, 7°34'E      | 2009<br>- 11 | GR                      | GCC, BCC                             | SOS                                                   | -                                 | Regions where snow melts at a later time reported to early BOS.                                                               | [112] |
| 41 | Italy          | 45°50'N, 7°34'E      | 2009<br>- 10 | GR                      | 2G_ Rbi, GCC,<br>BCC, RCC            | Canopy<br>greenness, LAI,<br>canopy<br>photosynthesis | EC, Hyperspectral<br>Irradiometer | Strong correlation between canopy greenness with LAI and canopy photosynthesis.                                               | [87]  |

|    |             |                  |              |                       |                        |                                                  |                                            |                                                                                                                                                                                                               |       |
|----|-------------|------------------|--------------|-----------------------|------------------------|--------------------------------------------------|--------------------------------------------|---------------------------------------------------------------------------------------------------------------------------------------------------------------------------------------------------------------|-------|
| 42 | USA         | 41°49'N, 72°14'W | 2012<br>- 14 | DF                    | GCC, RCC,<br>BCC, VARI | SOS, EOS, POR,<br>EOR                            | -                                          | Spring: SOS from a GCC correlated well with visually observed timing between onset and max leaf unfolding. Autumn: POR & EOR from RCC correlated well with the visual end of leaf drop and color change.      | [113] |
| 43 | Netherlands | 53°29'N, 6°13'E  | 2016<br>- 17 | GR                    | GCC                    | SOS, POS, EOS                                    | Sentinel 2                                 | The SOS derived from NDVI Sentinel-2 closely corresponded to the SOS camera-based GCC. The estimates for EOS-camera-based GCC series were two months earlier on average compared to the NDVI-based estimates. | [114] |
| 44 | Europe      | -                | 2008<br>- 14 | DF, EF, GR,<br>WL, CR | GCC                    | SOS, EOS, GU, Sen                                | EC                                         | Differences in color fractions and pigment concentrations in deciduous forests.                                                                                                                               | [59]  |
| 45 | USA         | -                | 2000<br>- 13 | DF                    | GCC                    | Spring leaf emergence                            | MODIS                                      | community composition impacts on phenological dynamics over large areas.                                                                                                                                      | [115] |
| 46 | USA         | -                | 2008<br>- 12 | DF                    | GCC, RCC               | SOS, MOS, EOS,<br>SOF, MOF, EOF                  | MEASURES,<br>MODIS                         | PhenoCam images exhibit lower levels of uncertainty compared to satellite imagery.                                                                                                                            | [37]  |
| 47 | Czechia     | 48°40'N, 16°56'E | 2014<br>- 17 | DF                    | GCC                    | GU, Mat, Sen,<br>Dorm                            | Ground<br>Observation                      | Correlation between ground and PhenoCam derived phenological periods.                                                                                                                                         | [116] |
| 48 | Sweden      | 57° 8'N, 14°44'E | 2018         | DF                    | VARI, GCC              | SOS, EOS                                         | MODIS, Sentinel-2,<br>UAV                  | PhenoCamGCC proved to be more effective in accurately monitoring the canopy's green-up compared to other indices.                                                                                             | [117] |
| 49 | Global      | -                | 1999<br>- 17 | DF                    | GCC                    | SOS, EOS                                         | Copernicus land<br>surface products,<br>EC | A substantial correlation for the SOS and a coefficient of determination ( $R^2$ ) exceeding 0.5 for the EOS.                                                                                                 | [23]  |
| 50 | USA         | -                | 2002<br>- 12 | DF, EF, GR            | GCC                    | Canopy<br>greenness,<br>Pigment<br>concentration | MERIS                                      | Significant correlations ranging from moderate to strong were identified between GCC and vegetation metrics derived from MERIS data at DF sites. However, weaker associations were noted over EF sites.       | [118] |

|    |         |                   |           |            |               |                                           |                               |                                                                                                                                                                                                                  |       |
|----|---------|-------------------|-----------|------------|---------------|-------------------------------------------|-------------------------------|------------------------------------------------------------------------------------------------------------------------------------------------------------------------------------------------------------------|-------|
| 51 | USA     | 42°32'N, 72°10'W  | 2008-12   | DF         | GCC           | Spring bud burst, POS, Sen, LAI           | MODIS, Ground Observation     | The emergence of spring-related changes in both Leaf Area Index (LAI) and the measured physiological and morphological characteristics is demonstrated to occur later than the initial rise in canopy greenness. | [40]  |
| 52 | Germany | 48°57'N, 13°25'E  | 2011      | DF         | GCC           | SOS, EOS, frost damage, re-sprouting, Mat | -                             | Individuals that exhibited an early onset of greening during the initial flushing phase experienced a briefer recovery period and commenced the second greening phase earlier.                                   | [49]  |
| 53 | USA     | -                 | 2002 - 10 | DF         | 2G_ RBi       | Gin, Gmax, Gdec, Gmin,                    | MODIS                         | Best correlation between PhenoCam and Modis                                                                                                                                                                      | [35]  |
| 54 | Germany | 49° 5'N, 13°16'E  | 2006 - 07 | DF         | GCC, RCC      | SOS, SEN, EOS, SOF                        | -                             | An approximate delay in the initiation of green-up of 2.5 days per 100 meters of altitude was calculated for <i>Fagus sylvatica</i> .                                                                            | [119] |
| 55 | UK      | -                 | 2011 - 12 | DF, EF, MF | GCC           | SOS, EOS, SOF, EOF                        | -                             | A strong correlation was found between automated method and visual inspection.                                                                                                                                   | [120] |
| 56 | Europe  | -                 | 2018 - 19 | DF, EF, GR | GCC           | SOS, EOS                                  | Sentinel-2, PEP725, EC        | For GPP phenology, PPI emerges as the most effective approach, especially for ECF.                                                                                                                               | [90]  |
| 57 | USA     | -                 | 1982 - 13 | DF         | GCC, RCC      | SOS, EOS                                  | Landsat, MODIS, EC            | Ground observations exhibit a stronger alignment with LPA derived estimates for SOS dates compared EOS dates.                                                                                                    | [121] |
| 58 | Sweden  | 64°11'N, 19°33'E  | 2011 - 12 | WL         | GCC, RCC, BCC | LAI, GEP                                  | EC                            | Strong correlations and seasonal hysteresis effects were observed between the GCC and LAI, day length, and GDDS.                                                                                                 | [122] |
| 59 | Kenya   | 1°38'S, 37° 8'E   | 2017 - 19 | GR         | GCC           | SOS, EOS                                  | Sentinel, MODIS, Planet Scope | Both Planet Scope and Sentinel-2 data sets resulted in acceptable extraction of phenological dates.                                                                                                              | [123] |
| 60 | Germany | 49° 6'N, 13°18'E  | 2001 - 16 | MF         | GCC           | SOS, EOS, POS                             | MODIS, EC                     | Increasing trend in GCC, was paralleled by increasing trends of GPP and satellite-based indices                                                                                                                  | [124] |
| 61 | China   | 24°32'N, 101° 1'E | 2010      | EF         | GCC, RCC      | SOG, EOG, Sen                             | -                             | The RCC was more accurate for estimating leaf senescence, while the GCC is accurate for estimating leaf development events.                                                                                      | [125] |

|    |               |                      |              |                       |                        |                        |                                        |                                                                                                                                                                                                    |       |
|----|---------------|----------------------|--------------|-----------------------|------------------------|------------------------|----------------------------------------|----------------------------------------------------------------------------------------------------------------------------------------------------------------------------------------------------|-------|
| 62 | USA           | 31°49'N,<br>110°52'W | 2013<br>- 16 | SV, GR, SH            | NDVI, GCC              | GPP                    | Landsat8, MODIS,<br>EC                 | The relationships between Greenness - GPP were not influenced by changes in spatial scales.                                                                                                        | [126] |
| 63 | Australia     | -                    | 2014<br>- 15 | GR                    | GCC                    | Biomass                | Landsat8,7,<br>MODIS                   | The primary factor driving variations in phenology among different grassland types is the dominance of C3/C4 species.                                                                              | [33]  |
| 64 | Thailand      | 8° 3'N, 98°24'E      | 2015<br>- 16 | MG                    | GCC, BCC,<br>RCC, VARI | SOG, EOG               | -                                      | Signals derived from the GCC exhibited a positive correlation with diurnal water levels in the background, whereas signals from the RCC displayed a negative relationship with tidal water levels. | [127] |
| 65 | North America | -                    | 2012<br>- 17 | EF                    | GCC, GRVI              | SOG, EOG, GPP          | EC, Field spec,<br>fluorometer         | Changes in canopy level color intensity can be used to project canopy-level photosynthesis                                                                                                         | [128] |
| 66 | USA           | -                    | 2018<br>- 19 | DF                    | GCC                    | SOS, EOS, SOF,<br>EOF  | MODIS, GOES                            | GOES displayed a higher degree of correlation with PhenoCam data.                                                                                                                                  | [129] |
| 67 | North America | -                    | 2016         | DF                    | GCC                    | SOG, EOG               | -                                      | The accuracy of the model improved when deep networks utilized region of interest images instead of using the entire images as inputs.                                                             | [130] |
| 68 | USA           | -                    | 2017<br>- 20 | EF, DF, CR,<br>GR, SH | GCC                    | SOS, EOS, SOF,<br>EOF  | Landsat, Sentinel<br>2, Planet scope   | Vegetation index - high temporal correlation for all the data sources.                                                                                                                             | [131] |
| 69 | Canada        | -                    | 2016<br>- 19 | EF                    | GCC                    | SOG, EOG, LOS          | MODIS                                  | EVI provided more accurate estimations of phenological dates compared to the NDVI.                                                                                                                 | [132] |
| 70 | India         | 32°35'N, 76°16'E     | 2017<br>- 18 | DF                    | RCC, GCC, BCC          | GU, Mat, Sen,<br>Dorm  | -                                      | GU occurred four days earlier in 2018 than in 2017, whereas Dorm occurred one day later                                                                                                            | [79]  |
| 71 | Japan         | 35-45N, 136-140E     | 2015<br>- 16 | CR                    | GCC                    | SOS, EOS, SOF &<br>EOF | Advanced<br>Himawari Imager<br>& MODIS | Difference in timing of SOS and EOF in the areas with natural vegetation, urban zones, and croplands highlights the influence of human activities LSP.                                             | [133] |
| 72 | USA           | 41°10'N, 96°26'W     | 2009<br>- 10 | CR                    | VARI, SR,<br>Cgreen    | Crop stages            | MODIS                                  | Camera-derived CLgreen, SR and NDVI demonstrated a high level of accuracy in estimating the overall LAI of maize and soybean crops.                                                                | [56]  |

**Table S2: PhenoCam networks worldwide.**

| Name                                                         | Country                | Date of establishment  | Biome/ forest type covered                                                                                                                                            | Number of Cameras | References                                                                                                                                                                        |
|--------------------------------------------------------------|------------------------|------------------------|-----------------------------------------------------------------------------------------------------------------------------------------------------------------------|-------------------|-----------------------------------------------------------------------------------------------------------------------------------------------------------------------------------|
| PhenoCam Network                                             | USA                    | 2008 and it is ongoing | Agriculture land, Deciduous (broad and needle), Evergreen (broad and needle), Grassland, Mixed vegetation, Shrubs, Tundra, Understory, Wetland                        | 528               | [41]                                                                                                                                                                              |
| The Phenological Eyes Network (PEN)                          | Japan                  | 2003 and it is ongoing | Deciduous (broad and needle ), , Evergreen Forest, Urban, Agricultural land, Rice paddy, Mixed Vegetation, Evergreen plantation forest, Dry grassland, Grassland, Sky | 38                | [57]                                                                                                                                                                              |
| Australian PhenoCam Network                                  | Australia              | 2014 and it is ongoing | Evergreen forests, Deciduous forest, Savana, Grasslands                                                                                                               | 15                | [60]                                                                                                                                                                              |
| European Phenology Camera Network (EuroPhen)                 | Europe (17 countries ) | 2008                   | Agriculture land, Deciduous forest, Evergreen forest, Peat land, Grassland                                                                                            | 65                | [59]                                                                                                                                                                              |
| European Integrated Carbon Observation System (ICOS) Network | Europe                 |                        | Forest, Grasslands, Cropland, and Wetlands                                                                                                                            | 42                | [59]                                                                                                                                                                              |
| National Ecological Observatory Network                      | USA                    | 2019                   | One is for vegetation monitoring and the other on the shore facing the aquatic body to capture land-water interface images                                            | 2                 | [58]                                                                                                                                                                              |
| Brazil PhenoCam Network                                      | Brazil                 |                        | The towers of the project are: Cerrado Core, Atlantic Rain Forest, Cerrado PEG, Amazon Forest, Caatinga, EE Itirapina and Serra Cipó.                                 | 7                 | <a href="http://intranet.recod.ic.unicamp.br/ephenology/client/index.html#/phenocamNetwork">http://intranet.recod.ic.unicamp.br/ephenology/client/index.html#/phenocamNetwork</a> |

**Table S3: Indian Ground based forest phenology monitoring sites**

**Phenological Properties:** PL: Production of young leaves, ML: maturation of leaves, AL: abscission of leaves, PF: production of young flowers, MF: maturation of flowers, AF: abscission of flowers, Pfu: production of young fruits, Mfu: maturation of fruits, Rfu: ripening of fruits, SG: Seed Germination, SD: Seed Dispersal, SP: Seed Production, FT: Floral Transformations, and LA: Leaf area

**Forest Types:** TMDF: Tropical Moist Deciduous Forest, TDFF: Tropical Dry Deciduous Forests, StPF: Subtropical Pine Forests, HMTF: Himalayan Moist Temperate Forests, TWEF: Tropical Wet Evergreen Forests, TSEF: Tropical Semi-evergreen Forests, TDEF: Tropical Dry Evergreen Forests, MWTF: Montane Wet Temperate Forests, LSF: Littoral & Swamp Forests, TTP: Tropical Thorn Forests, StBHF: Subtropical Broadleaved Hill Forests, TOF: Plantation/TOF



| Sl. No | Location                                                         | Year              | Method (Duration) | Forest Type      | Phenological Properties               | Reference |
|--------|------------------------------------------------------------------|-------------------|-------------------|------------------|---------------------------------------|-----------|
| 1      | Khasi Hills<br>(25°45"N; 91°45"E)                                | 1979-80           | 2 weeks           | TMDF             | PL, ML, AL, PF, MF, AF, Pfu, Mfu, Rfu | [71]      |
| 2      | Khasi Hills<br>(25°45"N; 91°45"E)                                | 1976-79           | Weekly            | TMDF             | PL, AL, LL                            | [134]     |
| 3      | Bandipur<br>(11°39' N; 76°37' E)                                 | 1975-76 & 1978-79 | 2 weeks           | TDDF             | PL, ML, AL, PF, MF, AF, Pfu, Mfu, Rfu | [66]      |
| 4      | Kumaun Himalayan<br>(29 ° 8' -29 ° 38'N; 79 ° 27' - 79 ° 43' E)  | 1981-83           | 4-5 days          | StPF, HMTF, TDDF | AL, PL, PF, Pfu                       | [67]      |
| 5      | Uttara Kannada<br>(13° 55' - 15° 31' N; 74° 9' - 75°10' E)       | 1983-85           | 2 weeks           | TWEF, TSEF, TMDF | PL, ML, AL, PF, MF, AF, Pfu, Mfu, Rfu | [135]     |
| 6      | Mudumalai Sanctuary<br>(11° 30' N -11° 39' N; 77°27' - 77°43' E) | 1988-90           | 2 weeks           | TDDF             | PL                                    | [68]      |
| 7      | Mudumalai Sanctuary                                              | 2000-08           | Monthly           | TDDF             | PL, ML, AL, PF, MF, AF, Pfu, Mfu, Rfu | [74]      |
| 8      | Mudumalai Sanctuary                                              | 1988-90           | 2 weeks           | TDDF             | PF, MF, AF, Pfu, Mfu, Rfu             | [136]     |
| 9      | Mundanthurai Tiger Reserve<br>(8°50'N ;77°00' E)                 | 1991-93           | Weekly            | TSEF             | PF, MF, AF, Pfu, Mfu, Rfu             | [69]      |
| 10     | Mundanthurai Tiger Reserve<br>(8° 33' N;77° 23'E)                | 1991-94           | 2 Week            | TWEF             | Mfu, Rfu, Fruit Abundance             | [137]     |
| 11     | Mundanthurai Tiger Reserve                                       | 1991-92           | Monthly           | TWEF             | PF, MF, AF, Pfu, Mfu, Rfu             | [138]     |
| 12     | Kodayar<br>(8°29'N;77°15'E)                                      | 2002-03           | 2 weeks           | TMDF, TWEF       | PL, ML, AL, PF, MF, AF, Pfu, Mfu, Rfu | [139]     |
| 13     | Tamil Nadu<br>(12°03" N;79°52" E)                                | 2003              | 2 weeks           | TDEF             | PF, MF, Pfu, Mfu, Rfu                 | [140]     |

|    |                                                                                      |                      |         |            |                                               |       |
|----|--------------------------------------------------------------------------------------|----------------------|---------|------------|-----------------------------------------------|-------|
| 14 | Palni hills<br>(10°01' -10°26'N; 77°14' -<br>77°52'E)                                | 2002-04              | 2 weeks | MWTF       | PF, MF, Pfu, Mfu, Rfu                         | [141] |
| 15 | Nilgiri hills<br>(11°43' N;76°87' E)                                                 | 2000-03              | Monthly | MWTF       | PL, ML, AL                                    | [142] |
| 16 | Bhadra Wildlife Sanctuary<br>(13°46' -13°52' N, 75°36' -<br>75°42'E)                 | 2004-06              | Monthly | TDDE, TWEF | PL, ML, AL                                    | [143] |
| 17 | Bhadra Wildlife Sanctuary                                                            | 2004-06              | Monthly | TDDE, TWEF | PL, ML, AL                                    | [144] |
| 18 | Hathinala Forest<br>(24°18' N,83°06' E)                                              | 2001-03              | Monthly | TDDE       | PL, AL                                        | [145] |
| 19 | Katerniaghat Wildlife<br>Sanctuary<br>( 28°20'N, 81° 7'E)                            | 2010-11              | Monthly | TMDF       | PL, ML, AL, PF, MF, Pfu,<br>Rfu, leaf area    | [72]  |
| 20 | Katerniaghat Wildlife<br>Sanctuary                                                   | 2009-12              | Monthly | TMDF       | PL, AL, PF, Pfu, Rfu                          | [146] |
| 21 | Gorakhpur Forest Division<br>(27°17'N; 83°35'E)                                      | 2016                 | 2 weeks | TMDF       | PL, AL, PF, MF, Mfu, Rfu,<br>Seed Germination | [147] |
| 22 | Similipal<br>( 21°35'N; 86°17'E)                                                     | 2003-04              | 2 weeks | TMDF       | PL, AL, PF, Pfu, Rfu                          | [148] |
| 23 | Bala-fort<br>(27°29'N; 76°30'E)                                                      | 2001-03              | 15 days | TDDE       | PL, AL, PF, Pfu, Rfu                          | [149] |
| 24 | Pakke Wildlife Sanctuary<br>and Tiger Reserve<br>(26°54'-27°16'N;92°36'-<br>93°09'E) | 1997-99 &<br>2009-11 | 2 weeks | TSEF       | PF, Pfu, Rfu, Seed Dispersal                  | [73]  |
| 25 | Tungnath<br>(30°14'N ;79°13'E)                                                       | 1988-98              | -       | HMTF       | PL, ML, AL, PF, MF, AF, Pfu,<br>Mfu, Rfu      | [150] |

|    |                                                                          |           |         |                       |                                            |       |
|----|--------------------------------------------------------------------------|-----------|---------|-----------------------|--------------------------------------------|-------|
| 26 | Goa<br>(15°48'-14°53' N;74°20'-73°40' E)                                 | 1997-2000 | 2 weeks | LSF, TSEF, TMDF, TWEF | PF, MF, AF                                 | [151] |
| 27 | Hollongapar Gibbon Wildlife Sanctuary<br>(26°40'-26°45'N;94°20'-94°25'E) | 2010-12   | Monthly | TSEF                  | PL, AL, PF, Pfu, Rfu, vegetative growth    | [152] |
| 28 | Chatla floodplain<br>(90.45 N, 24.45 E)                                  | 2012-14   | 15 days | TOF                   | PL, AL, PF, Pfu                            | [153] |
| 29 | Thiruporur<br>(11°00'-12°00';77°28' - 78°50'E)                           | 2009      | 2 weeks | TTF                   | Pfu, Mfu, Rfu                              | [154] |
| 30 | Pichavaram<br>(11°20'-11°30'N;79°45'-79°55'E)                            | 2 years   | 15 Days | LSF                   | PF, MF, AF, Pfu, Mfu, Rfu, Seed Production | [155] |
| 31 | Dargakona village<br>(24°41'N;92°41'E)                                   | 2004-05   | Weekly  | TSEF, TMDF            | PL, ML, AL, PF, AF, Pfu, Rfu               | [64]  |
| 32 | Amritsar<br>(31.28°N;74.29°E)                                            | 2009-11   | Daily   | TDDEF                 | PF, MF, Pfu, Mfu, Rfu, Seed Production     | [156] |
| 33 | Kangchup hills<br>(24.45°N;93.48°E)                                      | 1993-94   | Monthly | StBHF                 | PL, AL, PF, Pfu                            | [157] |
| 34 | Gujarat<br>(22°35' N;69°57' E, 22°31' N;69°56' E. 22°34' N;69°57' E.)    | 2007-09   | Daily   | LSF                   | Floral Transformations                     | [158] |
| 35 | Hathinala Forest<br>(24.18 N, 83.6 E)                                    | 2001-03   | Monthly | TDDEF                 | PL, ML, AL, PF, Pfu, Rfu                   | [159] |
| 36 | Kanha tiger reserve<br>(22.17°N;80.38°E)                                 | 14 months | Monthly | TMDF                  | PL, ML, AL, PF, MF, AF, Pfu, Mfu, Rfu      | [160] |
| 37 | Western Himalaya<br>(30°51'N;76.11 E)                                    | 1999-06   | 15 days | TOF                   | PL, ML, AL, PF, MF, AF                     | [161] |

|    |                                                   |         |         |                 |                                          |       |
|----|---------------------------------------------------|---------|---------|-----------------|------------------------------------------|-------|
| 38 | Shervaroys<br>(11.45'-11.55'N;78.10'-<br>78.20'E) | 1986-88 | Monthly | TDDE, TDEF, TTF | PF, MF, AF                               | [162] |
| 39 | Garhwal Himalaya<br>(30.10'N,78.47'E)             | 1986-87 | 4 Week  | SPF, TMDF       | PL, ML, AL, PF, MF, AF, Pfu,<br>Mfu, Rfu | [163] |
| 40 | Tunganath, Himalaya<br>(30.14'N,79.15'E)          | 1984    | Weekly  | HMTF            | PL, ML, AL, PF, MF, AF, Pfu,<br>Mfu, Rfu | [164] |
| 41 | Upper Shillong<br>(25.34'N;91.56'E)               | 1977-99 | Monthly | StPF, StBHF     | PL, ML, AL, Leaf area                    | [70]  |

## References

92. Nagai, S.; Maeda, T.; Gamou, M.; Muraoka, H.; Suzuki, R.; Nasahara, K.N. Using digital camera images to detect canopy condition of deciduous broad-leaved trees. *Plant Ecol. Divers.* **2011**, *4*, 79–89. <https://doi.org/10.1080/17550874.2011.579188>.
93. Zhang, X.; Jayavelu, S.; Liu, L.; Friedl, M.A.; Henebry, G.M.; Liu, Y.; Schaaf, C.B.; Richardson, A.D.; Gray, J. Evaluation of land surface phenology from VIIRS data using time series of PhenoCam imagery. *Agric. For. Meteorol.* **2018**, *256–257*, 137–149. <https://doi.org/10.1016/j.agrformet.2018.03.003>.
94. Nagai, S.; Saitoh, T.M.; Noh, N.J.; Yoon, T.K.; Kobayashi, H.; Suzuki, R.; Nasahara, K.N.; Son, Y.; Muraoka, H. Utility of information in photographs taken upwards from the floor of closed-canopy deciduous broadleaved and closed-canopy evergreen coniferous forests for continuous observation of canopy phenology. *Ecol. Inform.* **2013**, *18*, 10–19. <https://doi.org/10.1016/j.ecoinf.2013.05.005>.
95. Descals, A.; Verger, A.; Yin, G.; Peñuelas, J. Improved estimates of arctic land surface phenology using sentinel-2 time series. *Remote Sens.* **2020**, *12*, 3738. <https://doi.org/10.3390/rs12223738>.
96. Snyder, K.A.; Huntington, J.L.; Wehan, B.L.; Morton, C.G.; Stringham, T.K. Comparison of landsat and land-based phenology camera normalized difference vegetation index (NDVI) for dominant plant communities in the great basin. *Sensors* **2019**, *19*, 1139. <https://doi.org/10.3390/s19051139>.
97. Andresen, C.; Tweedie, C.; Loughheed, V. Climate and nutrient effects on Arctic wetland plant phenology observed from phenocams. *Remote Sens. Environ.* **2018**, *205*, 46–55. <https://doi.org/10.1016/j.rse.2017.11.013>.
98. Baumann, M.; Ozdogan, M.; Richardson, A.D.; Radeloff, V.C. Phenology from Landsat when data is scarce: Using MODIS and Dynamic Time-Warping to combine multi-year Landsat imagery to derive annual phenology curves. *Int. J. Appl. Earth Obs. Geoinf.* **2017**, *54*, 72–83. <https://doi.org/10.1016/j.jag.2016.09.005>.
99. Zhang, S.; Buttò, V.; Khare, S.; Deslauriers, A.; Morin, H.; Huang, J.-G.; Ren, H.; Rossi, S. Calibrating PhenoCam data with phenological observations of a black spruce stand. *Can. J. Remote Sens.* **2020**, *46*, 154–165. <https://doi.org/10.1080/07038992.2020.1761251>.
100. Marchin, R.M.; McHugh, I.; Simpson, R.R.; Ingram, L.J.; Balas, D.S.; Evans, B.J.; Adams, M.A. Productivity of an Australian mountain grassland is limited by temperature and dryness despite long growing seasons. *Agric. For. Meteorol.* **2018**, *256–257*, 116–124. <https://doi.org/10.1016/j.agrformet.2018.02.030>.
101. Inoue, T.; Nagai, S.; Saitoh, T.M.; Muraoka, H.; Nasahara, K.N.; Koizumi, H. Detection of the different characteristics of year-to-year variation in foliage phenology among deciduous broad-leaved tree species by using daily continuous canopy surface images. *Ecol. Inform.* **2014**, *22*, 58–68. <https://doi.org/10.1016/j.ecoinf.2014.05.009>.
102. Ahrends, H.; Etzold, S.; Kutsch, W.; Stoeckli, R.; Bruegger, R.; Jeanneret, F.; Wanner, H.; Buchmann, N.; Eugster, W. Tree phenology and carbon dioxide fluxes: Use of digital photography for process-based interpretation at the ecosystem scale. *Clim. Res.* **2009**, *39*, 261–274. <https://doi.org/10.3354/cr00811>.

103. Crimmins, M.A.; Crimmins, T.M. Monitoring plant phenology using digital repeat photography. *Environ. Manag.* **2008**, *41*, 949–958. <https://doi.org/10.1007/s00267-008-9086-6>.
104. Linkosalmi, M.; Aurela, M.; Tuovinen, J.-P.; Peltoniemi, M.; Tanis, C.M.; Arslan, A.N.; Kolari, P.; Böttcher, K.; Aalto, T.; Rainne, J.; et al. Digital photography for assessing the link between vegetation phenology and CO<sub>2</sub> exchange in two contrasting northern ecosystems. *Geosci. Instrum. Methods Data Syst.* **2016**, *5*, 417–426. <https://doi.org/10.5194/gi-5-417-2016>.
105. Jorge, C.; Silva, J.M.N.; Boavida-Portugal, J.; Soares, C.; Cerasoli, S. Using digital photography to track understory phenology in mediterranean cork oak woodlands. *Remote Sens.* **2021**, *13*, 776. <https://doi.org/10.3390/rs13040776>.
106. Nijland, W.; Coops, N.; Coogan, S.; Bater, C.; Wulder, M.; Nielsen, S.; McDermid, G.; Stenhouse, G. Vegetation phenology can be captured with digital repeat photography and linked to variability of root nutrition in *Hedysarum alpinum*. *Appl. Veg. Sci.* **2013**, *16*, 317–324. <https://doi.org/10.1111/avsc.12000>.
107. Paloschi, R.A.; Ramos, D.M.; Ventura, D.J.; Souza, R.; Souza, E.; Morellato, L.P.C.; Nóbrega, R.L.B.; Coutinho, Í.A.C.; Verhoef, A.; Körting, T.S.; et al. Environmental drivers of water use for caatinga woody plant species: combining remote sensing phenology and sap flow measurements. *Remote Sens.* **2020**, *13*, 75. <https://doi.org/10.3390/rs13010075>.
108. Koide, D.; Ide, R.; Oguma, H. Detection of autumn leaf phenology and color brightness from repeat photography: Accurate, robust, and sensitive indexes and modeling under unstable field observations. *Ecol. Indic.* **2019**, *106*, 105482. <https://doi.org/10.1016/j.ecolind.2019.105482>.
109. Wang, J.; Yang, D.; Detto, M.; Nelson, B.W.; Chen, M.; Guan, K.; Wu, S.; Yan, Z.; Wu, J. Multi-scale integration of satellite remote sensing improves characterization of dry-season green-up in an Amazon tropical evergreen forest. *Remote Sens. Environ.* **2020**, *246*, 111865. <https://doi.org/10.1016/j.rse.2020.111865>.
110. Atkins, J.W.; Stovall, A.E.L.; Yang, X. Mapping temperate forest phenology using tower, UAV, and terrestrial-based sensors. *Drones* **2020**, *4*, 56. <https://doi.org/10.3390/drones4030056>.
111. Liu, Y.; Hill, M.J.; Zhang, X.; Wang, Z.; Richardson, A.D.; Hufkens, K.; Filippa, G.; Baldocchi, D.D.; Ma, S.; Verfaillie, J.; et al. Using data from Landsat, MODIS, VIIRS and PhenoCams to monitor the phenology of California oak/grass savanna and open grassland across spatial scales. *Agric. For. Meteorol.* **2017**, *237–238*, 311–325. <https://doi.org/10.1016/j.agrformet.2017.02.026>.
112. Julitta, T.; Cremonese, E.; Migliavacca, M.; Colombo, R.; Galvagno, M.; Siniscalco, C.; Rossini, M.; Fava, F.; Cogliati, S.; Di Cella, U.M.; et al. Using digital camera images to analyse snowmelt and phenology of a subalpine grassland. *Agric. For. Meteorol.* **2014**, *198–199*, 116–125. <https://doi.org/10.1016/j.agrformet.2014.08.007>.
113. Xie, Y.; Civco, D.L.; Silander, J.A., Jr. Species-specific spring and autumn leaf phenology captured by time-lapse digital cameras. *Ecosphere* **2018**, *9*, e02089.
114. Vrieling, A.; Meroni, M.; Darvishzadeh, R.; Skidmore, A.K.; Wang, T.; Zurita-Milla, R.; Oosterbeek, K.; O'Connor, B.; Paganini, M. Vegetation phenology from Sentinel-2 and field cameras for a Dutch barrier island. *Remote Sens. Environ.* **2018**, *215*, 517–529. <https://doi.org/10.1016/j.rse.2018.03.014>.
115. Melaas, E.K.; Friedl, M.A.; Richardson, A.D. Multiscale modeling of spring phenology across Deciduous Forests in the Eastern United States. *Glob. Chang. Biol.* **2016**, *22*, 792–805. <https://doi.org/10.1111/gcb.13122>.
116. Nezval, O.; Krejza, J.; Světlík, J.; Šigut, L.; Horáček, P. Comparison of traditional ground-based observations and digital remote sensing of phenological transitions in a floodplain forest. *Agric. For. Meteorol.* **2020**, *291*, 108079.
117. Thapa, S.; Millan, V.E.G.; Eklundh, L. Assessing forest phenology: A multi-scale comparison of near-surface (UAV, spectral reflectance sensor, phenocam) and satellite (MODIS, sentinel-2) remote sensing. *Remote Sens.* **2021**, *13*, 1597. <https://doi.org/10.3390/rs13081597>.
118. Brown, L.A.; Dash, J.; Ogutu, B.O.; Richardson, A.D. On the relationship between continuous measures of canopy greenness derived using near-surface remote sensing and satellite-derived vegetation products. *Agric. For. Meteorol.* **2017**, *247*, 280–292. <https://doi.org/10.1016/j.agrformet.2017.08.012>.
119. Henneken, R.; Dose, V.; Schleip, C.; Menzel, A. Detecting plant seasonality from webcams using Bayesian multiple change point analysis. *Agric. For. Meteorol.* **2013**, *168*, 177–185. <https://doi.org/10.1016/j.agrformet.2012.09.001>.

120. Morris, D.E.; Boyd, D.S.; Crowe, J.A.; Johnson, C.S.; Smith, K.L. Exploring the potential for automatic extraction of vegetation phenological metrics from traffic webcams. *Remote Sens.* **2013**, *5*, 2200–2218. <https://doi.org/10.3390/rs5052200>.
121. Melaas, E.K.; Sulla-Menasse, D.; Gray, J.M.; Black, T.A.; Morin, T.H.; Richardson, A.D.; Friedl, M.A. Multisite analysis of land surface phenology in North American temperate and boreal deciduous forests from Landsat. *Remote Sens. Environ.* **2016**, *186*, 452–464. <https://doi.org/10.1016/j.rse.2016.09.014>.
122. Peichl, M.; Sonnentag, O.; Nilsson, M.B. Bringing color into the picture: using digital repeat photography to investigate phenology controls of the carbon dioxide exchange in a boreal mire. *Ecosystems* **2015**, *18*, 115–131. <https://doi.org/10.1007/s10021-014-9815-z>.
123. Cheng, Y.; Vrieling, A.; Fava, F.; Meroni, M.; Marshall, M.; Gachoki, S. Phenology of short vegetation cycles in a Kenyan rangeland from PlanetScope and Sentinel-2. *Remote Sens. Environ.* **2020**, *248*, 112004. <https://doi.org/10.1016/j.rse.2020.112004>.
124. Matiu, M.; Bothmann, L.; Steinbrecher, R.; Menzel, A. Monitoring succession after a non-cleared windthrow in a Norway spruce mountain forest using webcam, satellite vegetation indices and turbulent CO<sub>2</sub> exchange. *Agric. For. Meteorol.* **2017**, *244–245*, 72–81. <https://doi.org/10.1016/j.agrformet.2017.05.020>.
125. Zhao, J.; Zhang, Y.; Tan, Z.; Song, Q.; Liang, N.; Yu, L.; Zhao, J. Using digital cameras for comparative phenological monitoring in an evergreen broad-leaved forest and a seasonal rain forest. *Ecol. Inform.* **2012**, *10*, 65–72. <https://doi.org/10.1016/j.ecoinf.2012.03.001>.
126. Yan, D.; Scott, R.; Moore, D.; Biederman, J.; Smith, W. Understanding the relationship between vegetation greenness and productivity across dryland ecosystems through the integration of PhenoCam, satellite, and eddy covariance data. *Remote Sens. Environ.* **2019**, *223*, 50–62. <https://doi.org/10.1016/j.rse.2018.12.029>.
127. Songsom, V.; Koedsin, W.; Ritchie, R.J.; Huete, A. Mangrove phenology and water influences measured with digital repeat photography. *Remote Sens.* **2021**, *13*, 307. <https://doi.org/10.3390/rs13020307>.
128. Seyednasrollah, B.; Bowling, D.R.; Cheng, R.; Logan, B.A.; Magney, T.S.; Frankenberg, C.; Yang, J.C.; Young, A.M.; Hufkens, K.; Arain, M.A.; et al. Seasonal variation in the canopy color of temperate evergreen conifer forests. *New Phytol.* **2021**, *229*, 2586–2600. <https://doi.org/10.1111/nph.17046>.
129. Wheeler, K.I.; Dietze, M.C. Improving the monitoring of deciduous broadleaf phenology using the Geostationary Operational Environmental Satellite (GOES) 16 and 17. *Biogeosciences* **2021**, *18*, 1971–1985. <https://doi.org/10.5194/bg-18-1971-2021>.
130. Cao, M.; Sun, Y.; Jiang, X.; Li, Z.; Xin, Q. Identifying leaf phenology of deciduous broadleaf forests from phenocam images using a convolutional neural network regression method. *Remote Sens.* **2021**, *13*, 2331. <https://doi.org/10.3390/rs13122331>.
131. Moon, M.; Richardson, A.D.; Friedl, M.A. Multiscale assessment of land surface phenology from harmonized Landsat 8 and Sentinel-2, PlanetScope, and PhenoCam imagery. *Remote Sens. Environ.* **2021**, *266*, 112716. <https://doi.org/10.1016/j.rse.2021.112716>.
132. Khare, S.; Deslauriers, A.; Morin, H.; Latifi, H.; Rossi, S. Comparing time-lapse PhenoCams with satellite observations across the boreal forest of Quebec, Canada. *Remote Sens.* **2021**, *14*, 100. <https://doi.org/10.3390/rs14010100>.
133. Yan, D.; Zhang, X.; Nagai, S.; Yu, Y.; Akitsu, T.; Nasahara, K.N.; Ide, R.; Maeda, T. Evaluating land surface phenology from the Advanced Himawari Imager using observations from MODIS and the Phenological Eyes Network. *Int. J. Appl. Earth Obs. Geoinf.* **2019**, *79*, 71–83. <https://doi.org/10.1016/j.jag.2019.02.011>.
134. Shukla, R.P.; Ramakrishnan, P.S. Leaf dynamics of tropical trees related to successional status. *New Phytol.* **1984**, *97*, 697–706. <https://doi.org/10.1111/j.1469-8137.1984.tb03633.x>.
135. Bhat, D.M. Phenology of tree species of tropical moist forest of Uttara Kannada district, Karnataka, India. *J. Biosci.* **1992**, *17*, 325–352. <https://doi.org/10.1007/bf02703158>.
136. Murali, K.S.; Sukumar, R. Reproductive phenology of a tropical dry forest in Mudumalai, southern India. *J. Ecol.* **1994**, *82*, 759. <https://doi.org/10.2307/2261441>.

137. Ganesh, T.; Davidar, P. Fruiting phenology and pre-dispersal seed predation in a rainforest in southern Western Ghats, India. *Trop. Fruits Frugivores Search Strong Interactors* **2005**, 139–154.
138. Krishnan, R.M. Reproductive phenology of a wet forest understorey in the Western Ghats, South India. *Glob. Ecol. Biogeogr.* **2002**, *11*, 179–182. <https://doi.org/10.1046/j.1466-822x.2002.00276.x>.
139. Sundarapandian, S.M.; Chandrasekaran, S.; Swamy, P.S. Phenological behaviour of selected tree species in tropical forests at Kodayar in the Western Ghats, Tamil Nadu, India. *Curr. Sci.* **2005**, *88*, 805–810.
140. Selwyn, M.A.; Parthasarathy, N. Reproductive traits and phenology of plants in tropical dry evergreen forest on the Coromandel coast of India. *Biodivers. Conserv.* **2006**, *15*, 3207–3234. <https://doi.org/10.1007/s10531-005-0035-x>.
141. Sellamuthu, S.; Lalitha, V. Plant diversity and phenological pattern in the montane wet temperate forests of the southern Western Ghats, India. *For. Stud. China* **2010**, *12*, 116–125. <https://doi.org/10.1007/s11632-010-0302-0>.
142. Suresh, H.S.; Sukumar, R. Vegetative phenology of tropical montane forests in the Nilgiris, South India. *J. Natl. Sci. Found. Sri Lanka* **2011**, *39*, 333. <https://doi.org/10.4038/jnsfsr.v39i4.3882>.
143. Nanda, A.; Krishnamurthy, Y.L.; Suresh, H.S. Canopy trees leaf phenology in tropical dry deciduous and evergreen forests of Bhadra Wildlife Sanctuary Karnataka, India. *Afr. J. Plant Sci.* **2013**, *7*, 170–175. <https://doi.org/10.5897/ajps12.043>.
144. Nanda, A.; Suresh, H.S.; Krishna Murthy, Y.L. Leafing phenology of tropical forests of Bhadra wildlife sanctuary, Karnataka, India. *Appl. Sci. Rep.* **2015**, *12*, 33–40.
145. Kushwaha, C.P.; Singh, K.P. Diversity of leaf phenology in a tropical deciduous forest in India. *J. Trop. Ecol.* **2005**, *21*, 47–56. <https://doi.org/10.1017/s0266467404002032>.
146. Bajpai, O.; Pandey, J.; Chaudhary, L.B. Periodicity of different phenophases in selected trees from Himalayan Terai of India. *Agrofor. Syst.* **2017**, *91*, 363–374. <https://doi.org/10.1007/s10457-016-9936-9>.
147. Chaurasia, B.; Shukla, R.P. Changes in reproductive phenology and sex ratio of *Trewia nudiflora* Linn. Growing in sal Forest of North-eastern Uttar Pradesh, India. *Trop. Ecol.* **2016**, *57*, 89–99.
148. Mishra, R.K.; Upadhyay, V.P.; Bal, S.; Mohapatra, P.K.; Mohanty, R.C. Phenology of species of moist deciduous forest sites of Similipal biosphere reserve. *Lyonia* **2006**, *11*, 5–17.
149. Yadav, R.K.; Yadav, A.S. Phenology of selected woody species in a tropical dry deciduous forest in Rajasthan, India. *Trop. Ecol.* **2008**, *49*, 25–34.
150. Nautiyal, M.C.; Nautiyal, B.P.; Prakash, V. Phenology and growth form distribution in an alpine pasture at Tungnath, Garhwal, Himalaya. *Mt. Res. Dev.* **2001**, *21*, 168–174. [https://doi.org/10.1659/0276-4741\(2001\)021\[0168:pagfdi\]2.0.co;2](https://doi.org/10.1659/0276-4741(2001)021[0168:pagfdi]2.0.co;2).
151. Joshi, V.C.; Janarthanam, M.K. The diversity of life-form type, habitat preference and phenology of the endemics in the Goa region of the Western Ghats, India. *J. Biogeogr.* **2004**, *31*, 1227–1237. <https://doi.org/10.1111/j.1365-2699.2004.01067.x>.
152. Borah, M.; Devi, A. Phenology, growth and survival of *Vatica lanceaefolia* Bl.: A critically endangered tree species in moist tropical forest of Northeast India. *Trop. Plant Res.* **2014**, *1*, 1–12.
153. Nath, S.; Nath, A.J.; Das, A.K. Vegetative and reproductive phenology of a floodplain tree species *Barringtonia acutangula* from North East India. *J. Environ. Biol.* **2016**, *37*, 215–220.
154. Aruna, R.; Balasubramanian, P. Fruiting phenology of a scrub forest in thiruporur, Eastern Ghats, India. *Int. Lett. Nat. Sci.* **2015**, *44*, 25–30.
155. Arunparasath, A.; Gomathinayagam, M. Reproductive phenology of true mangrove species in Pichavaram mangrove forests, Tamilnadu, India—a comparative account. *J. Environ. Treat. Tech.* **2015**, *15*, 17–21.
156. Kaur, G.; Singh, B.P.; Nagpal, A.K. Phenology of Some Phanerogams (Trees and Shrubs) of Northwestern Punjab, India. *J. Bot.* **2013**, *2013*, 712405. <https://doi.org/10.1155/2013/712405>.

157. Kikim, A.; Yadava, P.S. Phenology of tree species in subtropical forests of Manipur in north eastern India. *Trop. Ecol.* **2001**, *42*, 269–276.
158. Pandey, R.; Pandey, C.N. Reproductive Strategy of *Aegiceras corniculatum* L. (Blanco.)—A Mangrove Species, in MNP&S, Gujarat, India. *J. Plant Stud.* **2014**, *3*, 35. <https://doi.org/10.5539/jps.v3n1p35>.
159. Singh, K.P.; Kushwaha, C.P. Diversity of flowering and fruiting phenology of trees in a tropical deciduous forest in India. *Ann. Bot.* **2006**, *97*, 265–276. <https://doi.org/10.1093/aob/mcj028>.
160. Newton, P.N. The structure and phenology of a moist deciduous forest in the Central Indian Highlands. *Vegetatio* **1988**, *75*, 3–16. <https://doi.org/10.1007/bf00044621>.
161. Thakur, P.S.; Dutt, V.; Thakur, A. Impact of inter-annual climate variability on the phenology of eleven multipurpose tree species. *Curr. Sci.* **2008**, *94*, 1053–1058.
162. Sivaraj, N.; Krishnamurthy, K.V. Flowering phenology in the vegetation of Shervaroys, South India. *Vegetatio* **1988**, *79*, 85–88. <https://doi.org/10.1007/bf00044851>.
163. Sundriyal, R.C. Phenology of some temperate woody species of the Garhwal Himalaya. *Int. J. Ecol. Environ. Sci.* **1990**, *16*, 107–117.
164. Sundriyal, R.C.; Joshi, A.P.; Dhasmana, R. Phenology of high altitude plants at Tungnath in the Garhwal Himalaya. *Trop. Ecol.* **1987**, *28*, 289–299.

**Disclaimer/Publisher's Note:** The statements, opinions and data contained in all publications are solely those of the individual author(s) and contributor(s) and not of MDPI and/or the editor(s). MDPI and/or the editor(s) disclaim responsibility for any injury to people or property resulting from any ideas, methods, instructions or products referred to in the content.
